# Supplementary material
Source: Springer Nature journal article supplement (https://www.springermedizin.de/resource/supplementary/12933_2013_657_MOESM1_ESM.pdf/9539082)

Male (n=2508)

Female (n=1693)

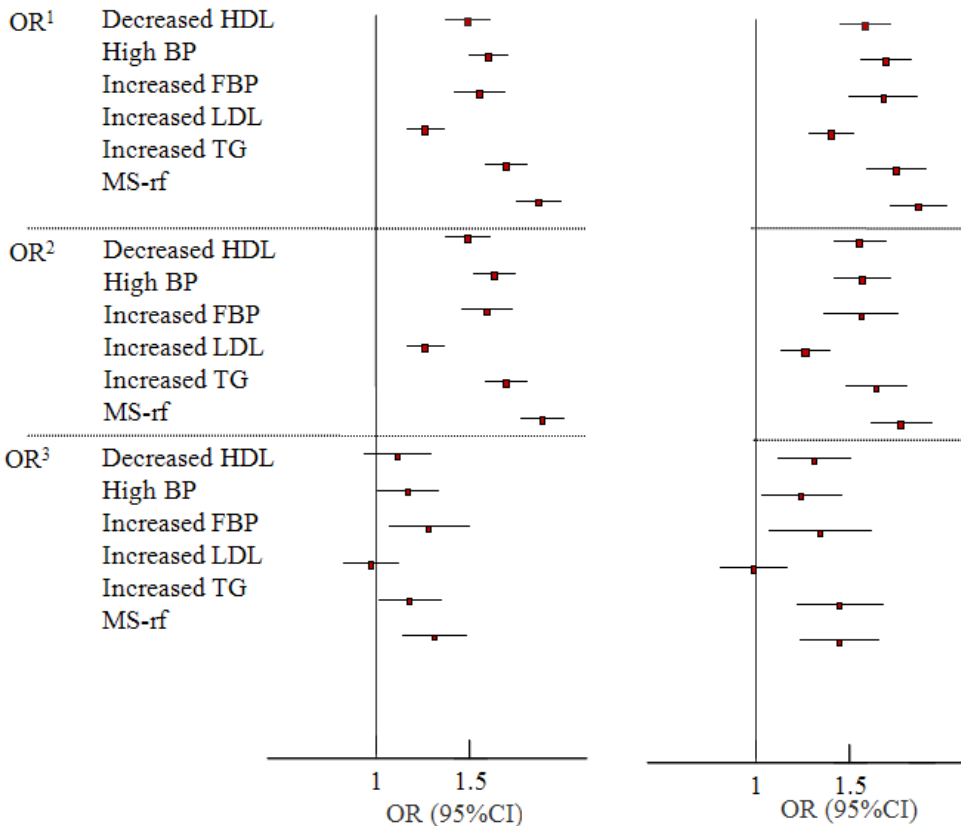

Supplement: MOESM1 [file 9539082]
